# Supplementary material for: Cu-doped Co 9 S 8− x sonozymes for enhanced sonodynamic and chemodynamic therapy of gallbladder cancer through ion doping and vacancy engineering
Source: Royal Society of Chemistry journal article supplement (doi:10.1039/d5tb02084k), 2025-01-01
Supplement: d5tb02084k1.pdf [file d5tb02084k1.pdf]

# **Cu-doped $\text{Co}_9\text{S}_{8-x}$ sonozymes for enhanced sonodynamic and chemodynamic therapy of gallbladder cancer through ion doping and vacancy engineering**

Qingxiang Gao<sup>a,1</sup>, Xi Yang<sup>b,1</sup>, Ni An<sup>c,1</sup>, Yang Shen<sup>a</sup>, Weilai Ji<sup>d</sup>, Lei Wang<sup>e</sup>, Kaijian Chu<sup>a</sup>, Chengjian He<sup>f,\*</sup>, Qing Ouyang<sup>g,\*</sup>, Zhilin Sha<sup>a,\*</sup>

<sup>a</sup> Department I of Biliary Tract Surgery, Eastern Hepatobiliary Surgery Hospital, Naval Medical University, Shanghai 201823, China

<sup>b</sup> Department of General Surgery, The Affiliated Shuyang Hospital of Xuzhou Medical University, Suqian, Jiangsu 223600, China

<sup>c</sup> Department of Anesthesiology, The Eighth medical center of Chinese PLA General Hospital, Beijing 100091, China

<sup>d</sup> Department of Hepatobiliary Surgery and Liver Transplant Center, Shenyang 4th hospital, Shengyang, Liaoning 110031, China

<sup>e</sup> Department of General Surgery, Yancheng Hospital of Traditional Chinese Medicine, Yancheng, Jiangsu 201823, China

<sup>f</sup> Department of Mini-invasive Intervention Center, Eastern Hepatobiliary Surgery Hospital, Naval Medical University, Shanghai 201823, China

<sup>g</sup> Department of Hepatobiliary Surgery and Liver Transplant Center, PLA General Hospital of Southern Theatre Command: People's Liberation Army General Hospital of Southern Theatre Command, Guangzhou, Guangdong 510010, China

\* Corresponding author.

*E-mail address:* chengjianhesjtu@163.com (C. He); kanshine@163.com (Q. Ouyang); szl\_dr@qq.com (Z. Sha)

<sup>1</sup> These authors contributed equally to this work.

**Keywords:**  $\text{Co}_9\text{S}_{8-x}$ , ion doping engineering, vacancy engineering, sonodynamic therapy, chemodynamic therapy

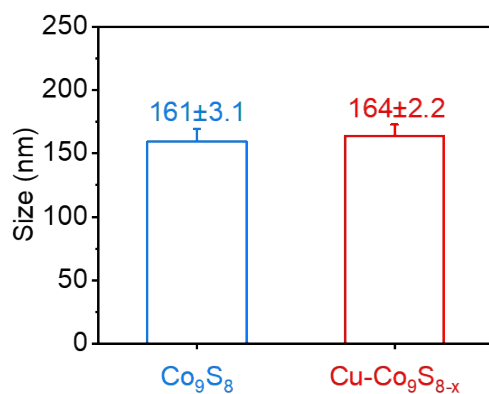

**Fig. S1.** DLS size of  $\text{Co}_9\text{S}_8$  and  $\text{Cu-Co}_9\text{S}_{8-x}$ . Data are presented as the mean  $\pm$  SD. ( $n = 3$ ).

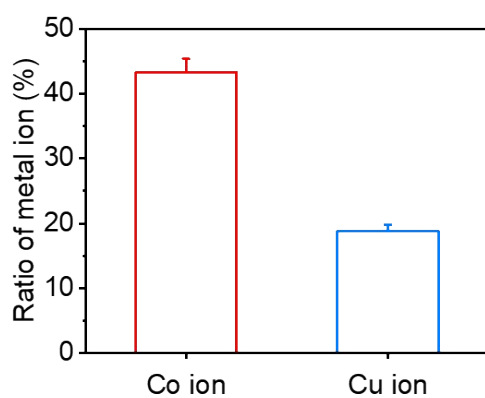

**Fig. S2.** The contents of Co and Cu ions in  $\text{Cu-Co}_9\text{S}_{8-x}$  determined by ICP-MS Data are presented as the mean  $\pm$  SD. ( $n = 3$ ).

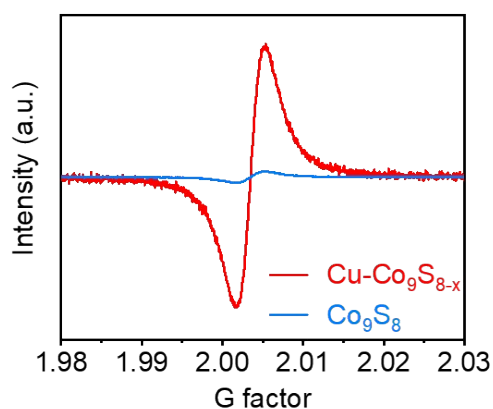

**Fig. S3.** EPR spectrum of  $\text{Co}_9\text{S}_8$  and  $\text{Cu-Co}_9\text{S}_{8-x}$ .

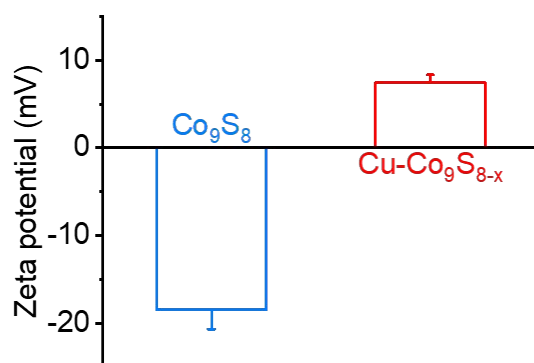

**Fig. S4.** Zeta potential of  $\text{Co}_9\text{S}_8$  and  $\text{Cu-Co}_9\text{S}_{8-x}$ . Data are presented as the mean  $\pm$  SD. (n = 3).

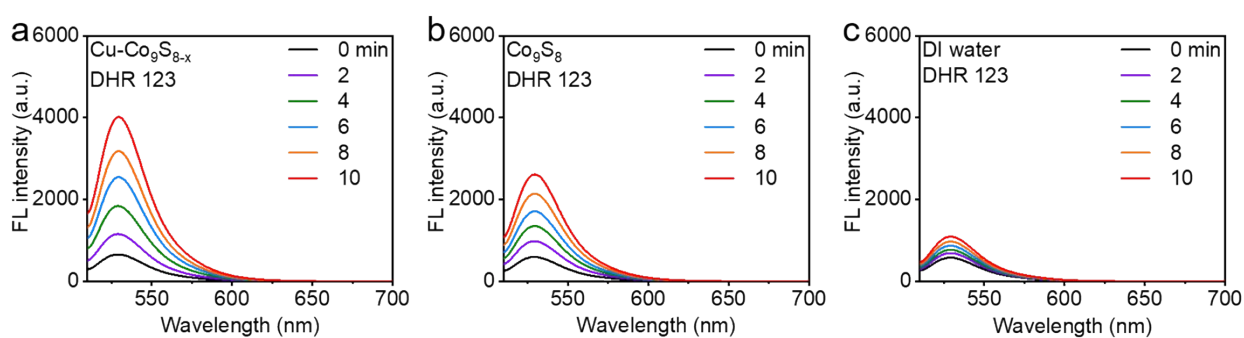

**Fig. S5.** Measurement of the  $\text{O}_2^{\cdot -}$  generation of  $\text{Cu-Co}_9\text{S}_{8-x}$  and  $\text{Co}_9\text{S}_8$  under US irradiation (50 kHz, 1.0 W/cm<sup>2</sup>).

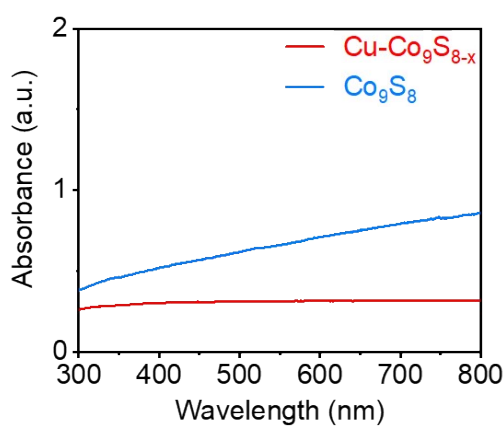

**Fig. S6.** UV-vis absorption of  $\text{Co}_9\text{S}_8$  and  $\text{Cu-Co}_9\text{S}_{8-x}$ .

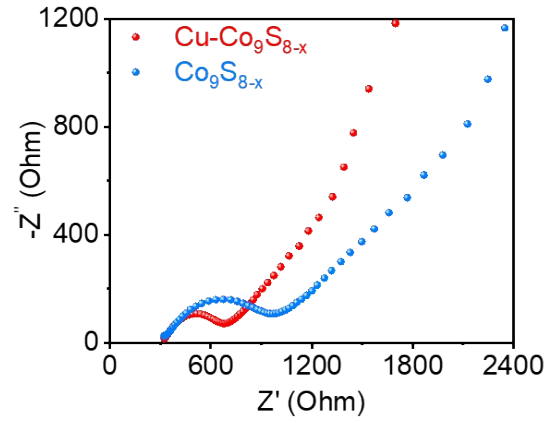

**Fig. S7.** The impedance spectra of  $\text{Co}_9\text{S}_{8-x}$  and  $\text{Cu-Co}_9\text{S}_{8-x}$  electrodes.

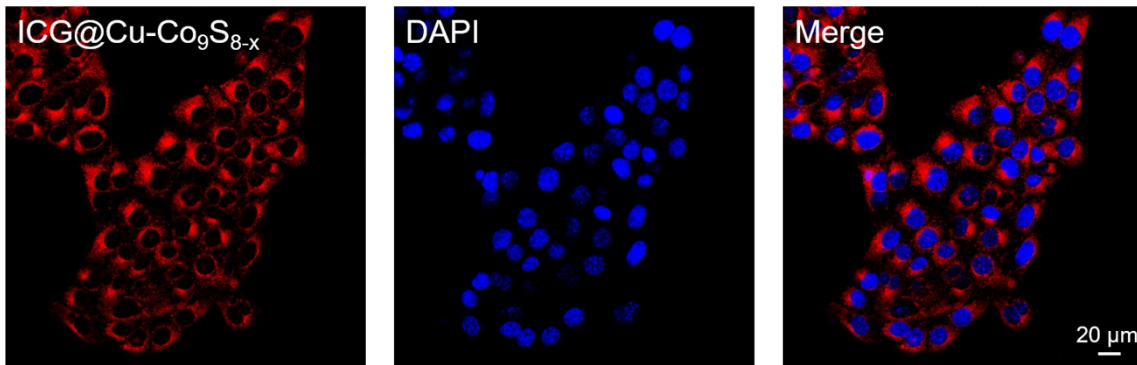

**Fig. S8.** Confocal images of NOZ cells after being treated with ICG-labeled  $\text{Cu-Co}_9\text{S}_{8-x}$  and DAPI.

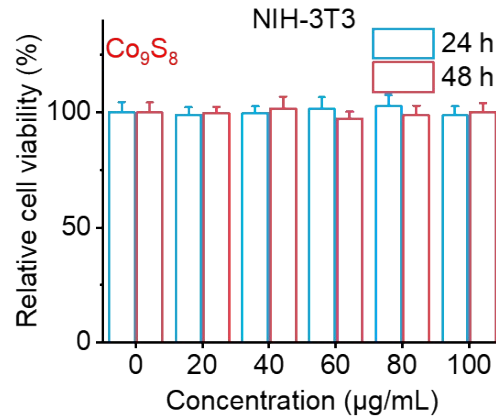

**Fig. S9.** Relative cell viabilities of NIH-3T3 cells incubated with  $\text{Co}_9\text{S}_8$  with varied concentrations for

24 or 48 h. Data are presented as the mean  $\pm$  SD. ( $n = 6$ ).

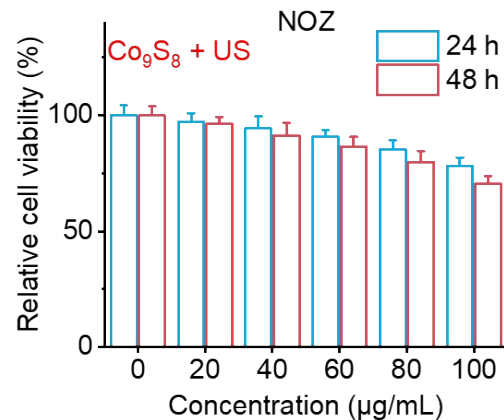

**Fig. S10.** Relative cell viabilities of NOZ cells incubated with  $\text{Co}_9\text{S}_8$  with varied concentrations for 24 or 48 h under US irradiation. Data are presented as the mean  $\pm$  SD. (n = 6)

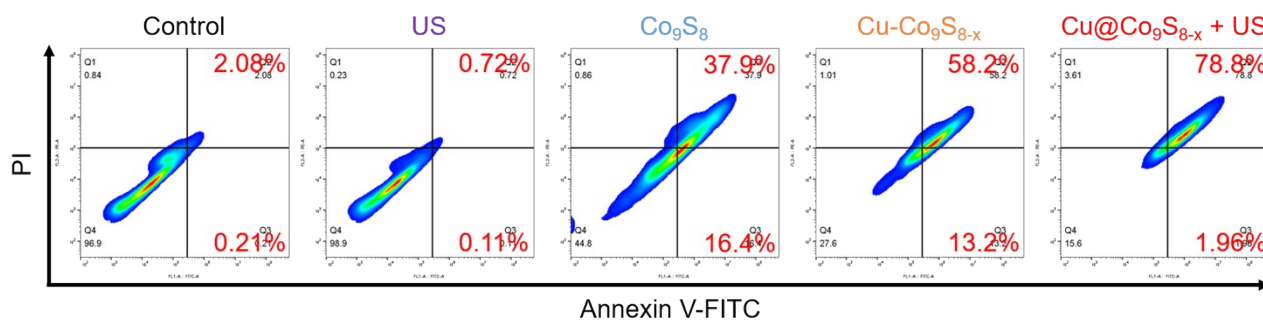

**Fig. S11.** Apoptosis assay of NOZ cells after different treatments through flow cytometry.

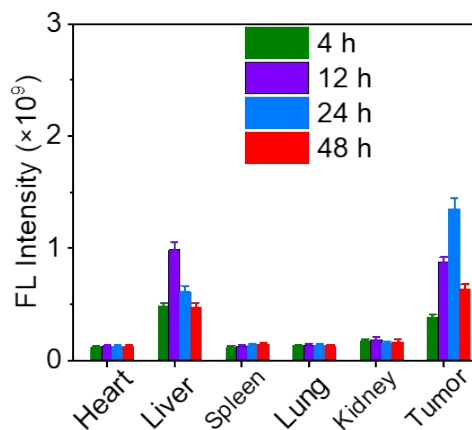

**Fig. S12.** Time-dependent fluorescence intensity of  $\text{Cu-Co}_9\text{S}_{8-x}$  in the major organs and tumor tissues.

Data are presented as the mean  $\pm$  SD. (n = 5).

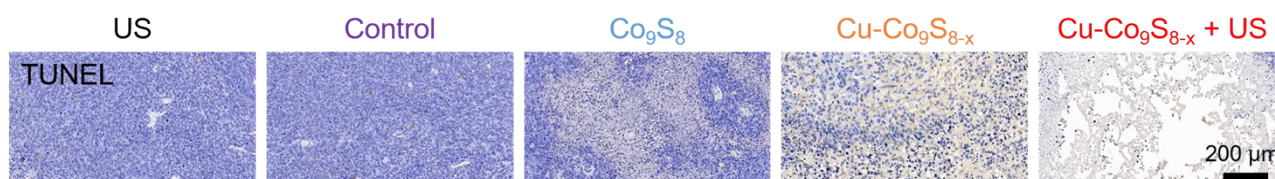

**Fig. S13.** TUNEL staining of tumors in mice after different treatments.

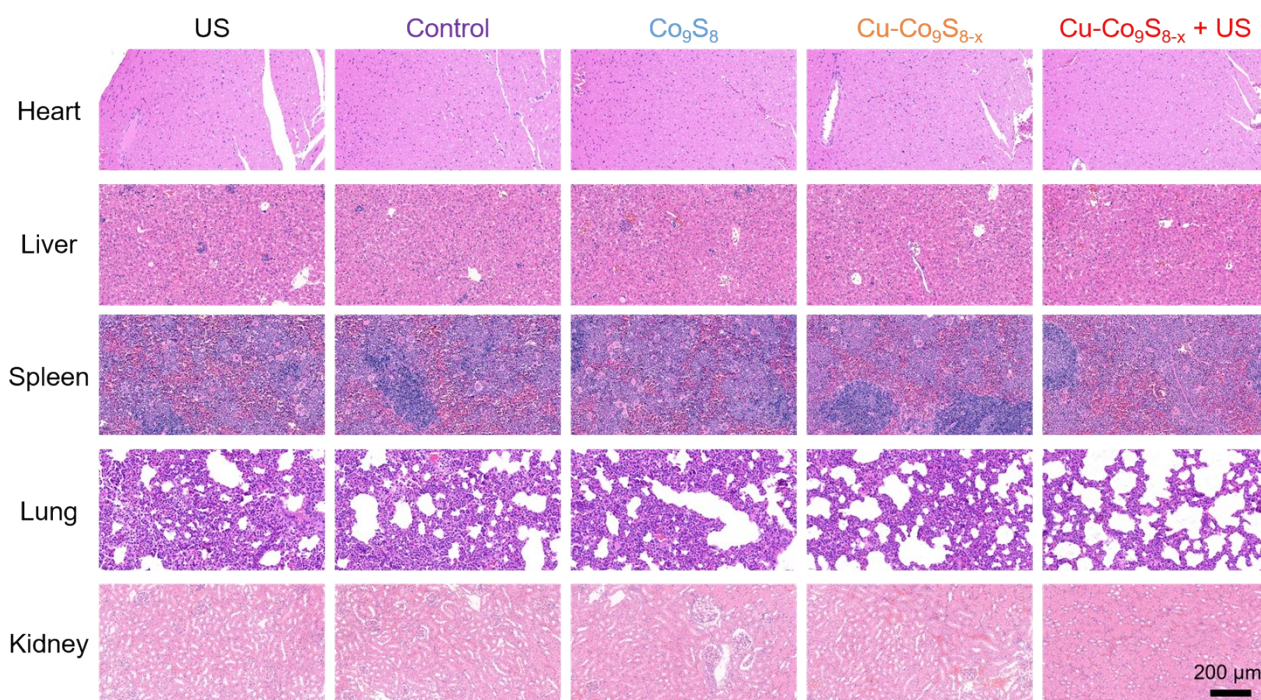

**Fig. S14.** H&E-stained images obtained from the major organs (heart, liver, spleen, lung, and kidney) of mice in different treatment groups.

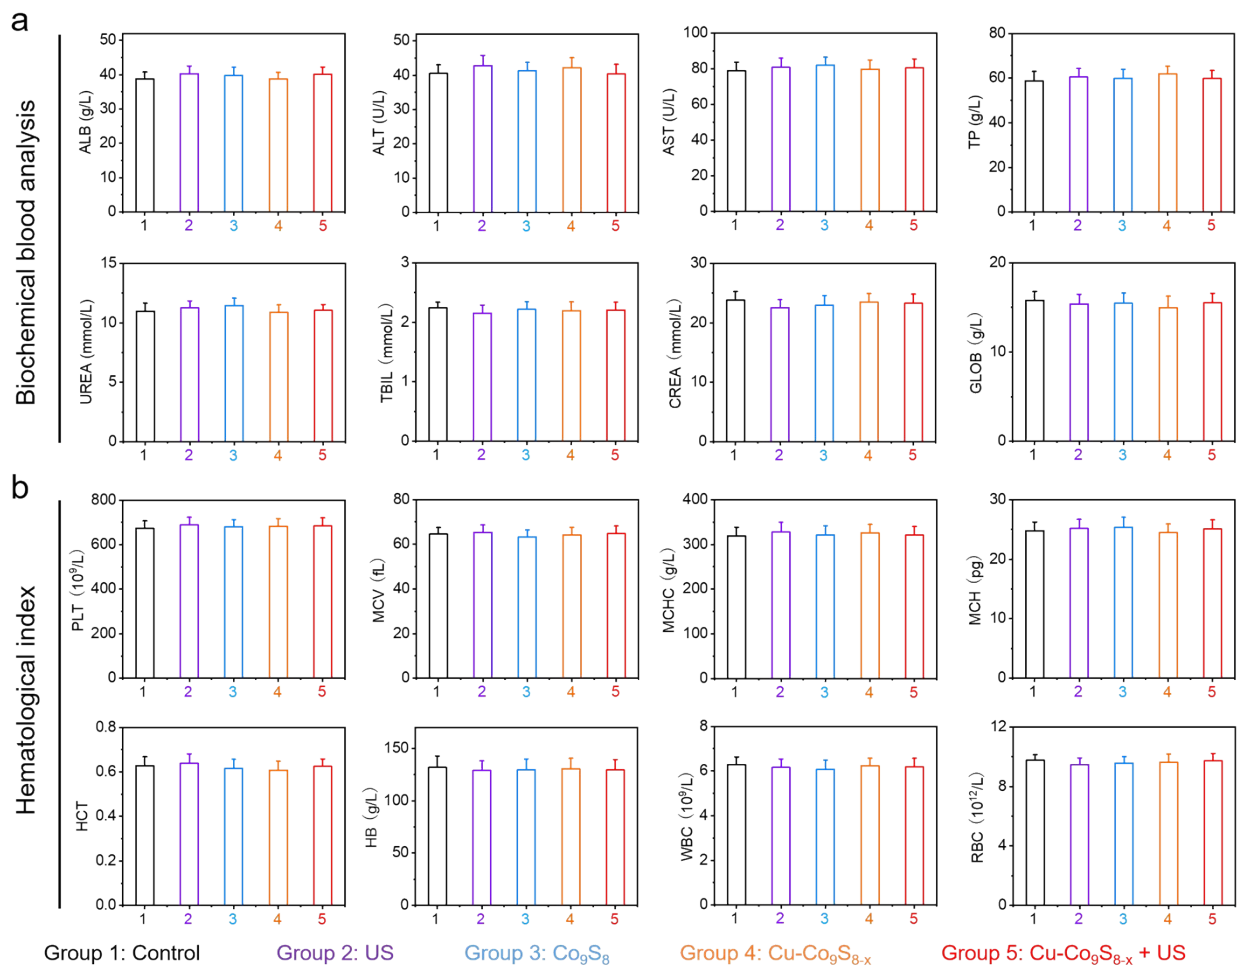

**Fig. S15.** (a-b) Biochemical blood analysis (a) and hematological index (b) of the mice that were sacrificed 18 days after different treatments.
